# Supplementary material for: Healthcare workers’ perceptions and attitudes towards the UK’s COVID-19 vaccination programme: a rapid qualitative appraisal
Source: HighWire-hosted journal article supplement (doi:10.1136/bmjopen-2021-051775), 2022-02-01
Supplement: bmjopen-2021-051775supp001_data_supplement.pdf [file bmjopen-2021-051775supp001_data_supplement.pdf]

**Appendix 1:** Characteristics of study participants

| Professional role                             | Sector/ Type of Facility                | Time in service (years) | Education level          | Ethnicity                               | Age                  | Gender |
|-----------------------------------------------|-----------------------------------------|-------------------------|--------------------------|-----------------------------------------|----------------------|--------|
| Occupational Therapist                        | Orthopaedics                            | 9                       | Undergraduate Degree     | Unknown/not reported                    | Unknown/not reported | F      |
| Service Manager in Theatres                   | Theatres & Anaesthetics/ Intensive Care | 20                      | Undergraduate Degree     | Mixed – White British & Black Caribbean | 41                   | F      |
| Geriatric Registrar                           | Geriatrics                              | 9                       | Medical Degree           | White British                           | Unknown/not reported | M      |
| Charge Nurse                                  | Intensive Care                          | 7                       | Unknown/not reported     | White Other (European)                  | 31                   | M      |
| Consultant Anaesthetist                       | Theatres & Anaesthetics/ Intensive Care | 2                       | Medical Degree           | White Other                             | 52                   | M      |
| General Practitioner                          | General Practitioner Surgery            | >6                      | Medical Degree & Masters | White British                           | 29                   | M      |
| Consultant Anaesthetist                       | Theatres & Anaesthetics/ Intensive Care | 16                      | Medical Degree & Masters | White Other                             | 46                   | F      |
| Nurse                                         | A & E                                   | 7                       | Masters                  | White Other                             | 26                   | F      |
| Specialist Nurse                              | Oncology                                | Unknown/not reported    | Unknown/not reported     | Mixed- Black & Scottish                 | Unknown/not reported | F      |
| Divisional Manager                            | Theatres & Anaesthetics                 | 20                      | Masters                  | White Other                             | 45                   | M      |
| Consultant Anaesthetist                       | Acute care                              | 17                      | Medical Degree           | British                                 | 48                   | M      |
| Consultant Anaesthetist                       | Theatres & Anaesthetics                 | 27                      | Medical Degree & Masters | Indian                                  | 51                   | F      |
| Neuro-physiotherapist                         | Outpatients & Community                 | 15                      | Masters                  | British                                 | 37                   | F      |
| General Manager                               | Intensive Care                          | 26                      | Masters                  | Mixed- British & Asian                  | 26                   | F      |
| Plastic and reconstructive surgeon            | Oncology                                | Unknown/not reported    | Medical Degree & Masters | White Other (Greek)                     | Unknown/not reported | M      |
| Nurse                                         | A & E/ Intensive Care                   | 13                      | Unknown/not reported     | Unknown/not reported                    | 35                   | F      |
| Consultant anaesthetist and Clinical Director | Theatres & Anaesthetics                 | 33                      | Medical Degree & Masters | White British                           | 56                   | F      |
| Senior Clinical Pharmacist                    | Pharmacy                                | 21                      | Masters                  | British Asian                           | 43                   | F      |

|                                     |                                              |    |                          |                          |    |   |
|-------------------------------------|----------------------------------------------|----|--------------------------|--------------------------|----|---|
| Data Manager                        | Bone Marrow Transplant                       | 6  | Masters                  | Asian (Sri-Lankan)       | 28 | F |
| Clinical Specialist Physiotherapist | adolescent and the young adult rheumatology. | 23 | Undergraduate Degree     | White British (European) | 53 | F |
| Specialist Nurse                    | Gastroenterology/ Surgical Ward              | >5 | Masters                  | White Other (Italian)    | 55 | F |
| Consultant Anaesthetist             | Theatres & Anaesthetics                      | 18 | Masters & Medical Degree | British Indian           | 40 | M |
| Consultant Anaesthetist             | Theatres & Anaesthetics                      | 13 | Medical Degree & Masters | Asian Other              | 36 | F |
| Pathway Coordinator                 | Interventional Oncology Service              | 10 | Degree                   | Black British            | 54 | F |

## Appendix 2: Interview topic guide

*“How much time do you have available today? The interview takes about 30 minutes on average, but it can go on longer depending on how much you want to say”*

**First, I want to ask you again about your work and the services you provide.**

**Frame questions 1-4 around reflecting on the differences between wave 1&2**

- **How are things compared to wave 1/ last time you did an interview?**
- **Can you give me a picture of how things are now? How do you feel about the changes?**

### **1. Background: Can you tell me about your role?**

- *Can you tell me a bit about your role? (e.g., Daily tasks, department, responsibilities)*

### **2. How has the COVID-19 outbreak affected health services in your department?**

*Probes:*

- *How has this affected your normal daily tasks/responsibilities? Change of role?*
- *Impact of COVID-19 on the delivery of services to non-COVID-19+ patients (i.e., cancellation of elective surgeries)*
- *What tasks are you able to do more or less effectively?*
- *How do you manage the isolation of suspected cases and confirmed cases?*
- *Has there been appropriate transfer of patients within and out of hospital?*
- *Has there been an impact on staff's ability to make diagnoses and act on them?*
- *Has the supply of drugs, equipment and PPE been affected?*
- *Have staff been redeployed from or within your health facility?*

### **3. Do you currently have any concerns or fears in relation to ...**

- Work (response efforts, PPE, services)
- The national effort

### **4. How has your life at home been impacted by COVID-19?**

### **5. Mental health support (to address risk of moral injury, trauma and developing severe mental health problems)**

- Are you aware of any support available for staff wellbeing and mental health?
- Have you had the opportunity to talk about your mental health with your supervisor/team leader?
- Have you had worrying experiences in the last week? Did you receive support after? If so, what type of support? (including formal and informal support)
- Interactions between peers: Do you have time to socialise with your team? What has changed with COVID-19?

### **6. Do you feel your experience has been different from other HCWs? Does gender play a role? How about race or ethnicity?**

*Probes (relevant to non-BAME participants who mention ethnicity/race too):*

- Have you been impacted by the news that BAME HCWs have been disproportionately dying of COVID-19? [*Probe for how they have been impacted (e.g. emotionally, practically...) and whether (and how) they have been supported by management*]

- Have you received a risk assessment as a BAME HCW? [*Whether they answer yes or no:*] How do you feel about it? [*Background information for the interviewer: NHS England, in response to disproportionate impact of C19 on BAME HCWs, introduced risk assessments that specifically consider the physical and mental health of BAME staff*]
- Have wider news of BAME population in the UK being disproportionately impacted by COVID-19, as well as the wider BLM movement, affected you alongside your experiences working through the pandemic? [*Probe on how they were affected*]
- How was redeployment approached at your facility? [*Probe on any patterns of redeployment and if certain groups, e.g., BAME HCWs, seemed more likely to be redeployed*]

## 7. VACCINATION QUESTIONS

1. Have you heard anything about COVID-19 vaccines? Where?
2. What do you think about these vaccines?

### **Effectiveness:**

#### **General question – How effective do you think the vaccine will be?**

##### *Example prompts:*

- What are the potential benefits of the vaccine?
- Do you think it will provide immunity? If so, how long do you think it will provide immunity?
- Do you think “booster” shots will be necessary to extend immunity?
- Do you think it will be effective in fighting different mutations of the virus?

#### **Sub-question: (effectiveness of) different vaccine types:**

- Did you know that there are different types of vaccines?
- Do you think the effectiveness of these vaccines varies?
- Does the general public feel differently about these vaccines?

### **Safety:**

1. What do you think about the potential risks and benefits of having the vaccine?

##### *Example prompts:*

- If so, do you think they will be long-term?
- Are you personally willing to accept any of these risks?
- Have you ever discussed these potential risks with family, friends, or patients?
- Do you feel obligated to promote the vaccine?

### **Vaccine delivery:**

1. (Delivering the vaccine to the population) What do think about the work of delivering the vaccine at scale??

##### *Example prompts:*

- How practical and probable do you think mass vaccination is?
- Have you heard anything about the strategies the UK will use to deliver the vaccine?
- Will you play a role in vaccination? If so, what role specifically?

2. (Delivering the vaccine to HCWs) How should we prioritise access to the vaccine for HCWs?

*Example prompts:*

- Do you think everyone will have access immediately or will a ranking system be implemented?
  - What place in the ranking do you think HCWS will occupy?
3. What impact do you think vaccination will have on the NHS?

**Personal choices/decisions:**

1. Do you think HCWs should be vaccinated? Should they be a priority group?
2. If the vaccine were available tomorrow, would you get vaccinated?

**GENERAL REFLECTIONS**

**Again – framing in relation to the first wave – ‘Based on what you have learnt and experienced over the past few months... ‘**

**8. How have health services been strengthened, or how could they be strengthened during the outbreak?**

*Probes:*

- **Support to HCWs from the health system and partners?**
- **Capacity for rapid response**
- *Policies? e.g., Guidance and emergency protocols?*
- *What would help HCWs to maintain normal services as well as COVID related services?*
- *If GP: Health promotion and community engagement. How?*
- *If GP: Linkage to other support organisations, e.g., charities, schools?*

**9. Is there anything you feel should be changed to make health services more effective in future emergencies?**

*Probes:*

- **Support to HCWs? From whom and How?**
- *Coordination and official guidance of COVID-19 response.*
- **Early detection and reporting.**
- *On-going health promotion and community education. E.g., potential sources of infection, safe practice?*
- *Mobilisation? E.g., identifying and coordinating trusted community volunteers and support?*
- *Disease outbreak control activities?*
- **Testing (public and staff)**

**10. Do you have any caring responsibilities, such as children or elderly family members?**

If yes:

- a. How are you managing care during the COVID-19 pandemic?
- b. *(If they have children)* How has being a HCW during the pandemic impacted your ability to parent?
- c. What fears, worries, or emotions arise from the responsibility of caring for others during this time?

**11. Are you pregnant?**

- a. If so, how has this impacted your work and experience as a HCW during the COVID-19 pandemic?

**12. Is there anything else you would like to mention that you feel is important?**

**Thank you for your time and for sharing your opinions and experiences with us.**

### Appendix 3

Policy review inclusion criteria:

- Published between 1 December 2020 and 15 February 2021;
- Related to the COVID-19 pandemic;
- Related to the UK's mass vaccination programme.

### Appendix 4

| Policy/guidance title                                                                                      | Publication location            | Date of publication                                           | Scope                                                 | Healthcare sector                                         |
|------------------------------------------------------------------------------------------------------------|---------------------------------|---------------------------------------------------------------|-------------------------------------------------------|-----------------------------------------------------------|
| <b>Week One: Implementing the Covid Vaccination Programme</b>                                              | NHS England and NHS Improvement | 4-Dec-20                                                      | 50 hospital hubs only (in England - from Policy ID 3) | Secondary/tertiary care                                   |
| <b>COVID-19 vaccinator competency assessment tool</b>                                                      | Public Health England           | Document created 27-Nov-20 and updated 6-Dec-2020             | United Kingdom                                        | Facilities involved in the COVID-19 vaccination programme |
| <b>COVID-19 vaccinations and care homes: programme launch</b>                                              | GOV.UK                          | 4-Dec-20                                                      | England                                               | Secondary/tertiary care                                   |
| <b>COVID-19 vaccination programme: Information for healthcare practitioners</b>                            | Public Health England           | Document created 27-Nov-20 and republished 31-Dec-20          | United Kingdom                                        | NA                                                        |
| <b>Greenbook chapter 14a</b>                                                                               | GOV.UK                          | Document first published 27-Nov-20 and last updated 31-Dec-20 | United Kingdom                                        | NA                                                        |
| <b>Joint Committee on Vaccination and Immunisation: advice on priority groups for COVID-19 vaccination</b> | GOV.UK                          | 30-Dec-20                                                     | United Kingdom                                        | NA                                                        |
| <b>COVID-19 vaccination: protection for healthcare workers</b>                                             | GOV.UK                          | Document first published 7-Dec-20 and last updated 31-Dec-20  | United Kingdom                                        | NA                                                        |

|                                                                                                                                                                    |        |                                                              |                |                  |
|--------------------------------------------------------------------------------------------------------------------------------------------------------------------|--------|--------------------------------------------------------------|----------------|------------------|
| <b>COVID-19 vaccination: guide for older adults</b>                                                                                                                | GOV.UK | Document first published 7-Dec-20 and last updated 31-Dec-20 | United Kingdom | NA               |
| <b>COVID-19 vaccination: a guide for women of childbearing age, those currently pregnant or breastfeeding</b>                                                      | GOV.UK | Document first published 6-Dec-20 and last updated 31-Dec-20 | United Kingdom | NA               |
| <b>COVID-19 vaccination: a guide for social care staff</b>                                                                                                         | GOV.UK | Document first published 7-Dec-20 and last updated 31-Dec-20 | United Kingdom | Social care      |
| <b>The safety of COVID-19 vaccines when given in pregnancy</b>                                                                                                     | GOV.UK | Published 18-Dec-20                                          | United Kingdom | NA               |
| <b>Training recommendations for COVID-19 vaccinators</b>                                                                                                           | GOV.UK | Last updated 8-Dec-20                                        | United Kingdom | NA               |
| <b>Vaccination in pregnancy</b>                                                                                                                                    | GOV.UK | Published 1-May-10 and last updated 31-Dec-20                | United Kingdom | NA               |
| <b>Annex A: Report to JCVI on estimated efficacy of a single dose of Pfizer BioNTech (BNT162b2 mRNA) vaccine and of a single dose of ChAdOx1 vaccine (AZD1222)</b> | GOV.UK | Published 22-Dec-2020                                        | United Kingdom | NA               |
| <b>Annex B: comparison between 1 and 2 dose prioritisation for a fixed number of doses</b>                                                                         | GOV.UK | Published Jan-2021                                           | United Kingdom | NA               |
| <b>COVID-19 vaccination programme</b>                                                                                                                              | BMA    | Published 15-Feb-2021                                        | England        | General practice |
| <b>COVID-19 vaccination programme: Information for healthcare practitioners</b>                                                                                    | GOV.UK | Re-published 11-Feb-2021                                     | United Kingdom | NA               |
| <b>PHE immunisation inequalities: local action plan template</b>                                                                                                   | GOV.UK | Published Feb-2021                                           | England        | NA               |



|                                                                                               |        |                          |                |    |
|-----------------------------------------------------------------------------------------------|--------|--------------------------|----------------|----|
| <b>National Immunisation Programme: health equity audit</b>                                   | GOV.UK | Published Feb-2021       | England        | NA |
| <b>PHE Immunisation Inequalities Strategy</b>                                                 | GOV.UK | Published 2-Feb-2021     | England        | NA |
| <b>Integration and Innovation: working together to improve health and social care for all</b> | GOV.UK | Published Feb-2021       | England        | NA |
| <b>Optimising the COVID-19 vaccination programme for maximum short-term impact</b>            | GOV.UK | Last updated 26-Jan-2021 | United Kingdom | NA |
| <b>UK COVID-19 vaccines delivery plan</b>                                                     | GOV.UK | Published 11-Jan-2021    | United Kingdom | NA |
